# Supplementary material
Source: Research Square preprint supplement (doi:10.21203/rs.3.rs-9405415/v1)
Supplement: Supplementary file 1 [file 6d63dbdb5bda6e630bd25007.docx]

**Phosphorus Fractions and Sorption-Release in Huixian Karst Wetland Soils under Varying Ca2+ and HCO3- Conditions**

Kun Donga,b,c, Jiayu Yanga,b,c, Haixiang Lia,b,c, Sze-Mun Lama,b,c,d, Jin-Chung Sina,b,c,d, Dunqiu Wanga,b,c,*

a College of Environmental Science and Engineering, Guilin University of Technology, Guilin 541006, China

b Engineering Research Center of Watershed Protection and Green Development, University of Guangxi, Guilin University of Technology, Guilin, 541006, China

c Guangxi Engineering Research Center of Comprehensive Treatment for Agricultural Non-Point Source Pollution, Guilin University of Technology, Guilin, 541006, China

d Faculty of Engineering and Green Technology, Universiti Tunku Abdul Rahman, Jalan Universiti, Bandar Barat, 31900 Kampar, Perak, Malaysia

*** Corresponding author**

Email: wangdunqiu@glut.edu.cn (D.Wang).

**Keywords:** Huixian Karst Wetland, Phosphorus speciation, Adsorption Kinetics, Phosphorus Release.

The supporting information contains tables (Table S1-S3 ).

**Contents**

**Tables**

**Table S1** Extraction methods of different forms of phosphorus in soil.

**Table S2** Experimental treatment of control variable method.

**Table S3** Preparation of static test water.

**Table S1** Extraction methods of different forms of phosphorus in soil

| Morphological Name | Code | Extracting steps |
| --- | --- | --- |
| Exchange state phosphorus | Ex-P | In 0.3 g of soil, 30 mL of MgCl2 (1 mol·L-1) was shaken (200 r·min-1) for 2 hours. Then, the mixture was centrifuged at 5000 rpm for 20 minutes to obtain the extract. The supernatant was carefully poured into a 100 mL centrifuge tube. In the same way, MgCl2 was used for another extraction, and then combined with the extract. After centrifugation, the extract was mixed with the supernatant again. Then, 30 mL of deionized water was used for simultaneous extraction for 1 hour. After combining with the extract, it was filtered through a 0.45 μm filter membrane. The extracted liquid was directly used to detect the phosphorus content by the molybdenum-sulfur antimony reagent method. At the same time, the extract was used as a blank test. |
| Aluminum combined with phosphorus | Al-P | Add 30 mL of 0.5 mol·L-1 NH4-F (pH = 8.2) to the residual Ex-P and shake it (at 200 r·min-1) for 1 hour. Centrifuge it (at approximately 3500 r·min-1 for 8 minutes) to obtain the extract. Then, extract it with 30 mL of deionized water for 1 hour. Combine the extract solutions and transfer the above leaching solution to a 100 mL volumetric flask. Add 10 mL of 1 mol·L-1 H3BO3 solution and 10 mL of 1 mol·L-1 HCl. Use the molybdenum antimony antimony method for determination. At the same time, use the extract as a blank test. |
| Iron binding to phosphorus | Fe-P | Al-P residue was mixed with 30 mL of 0.1 mol·L-1 NaOH and 0.5 mol·L-1 Na2CO3 solution, and the mixture was extracted by shaking (200 r·min-1) for 4 hours. The extract was then centrifuged to obtain the extract solution. Another 30 mL of deionized water was added for extraction for 1 hour. The extract solutions were combined (totaling 60 mL), and 1 mL of concentrated sulfuric acid was added (totaling 61 mL). The extract solution was then measured for phosphorus concentration using the molybdenum-sulfur antimony method. At the same time, a blank test was conducted using the extract solution. |
| Capped phosphorus | Oc-P | The residual residue after Fe-P extraction was added with 24 mL of a mixed extraction agent composed of sodium citrate (0.3 mol·L-1), sodium bicarbonate (1 mol·L-1) and 0.675 g of sodium sulfite (pH = 7.6). After stirring for 15 minutes, 6 mL of sodium hydroxide (0.5 mol·L-1) was added and the extraction was shaken for 8 hours. The extract was then centrifuged to obtain the extract solution. The extract solution was washed with 30 mL of deionized water for 1 hour and the combined extract solution was 60 ml. The extract solution was measured using the molybdenum-sulfur antimony reagent method (requiring digestion) and the extract solution was used as a blank test. |
| Calcium binds to phosphorus | Ca-P | The residual residue of Oc-P was added with 30 mL of 1 mol·L-1 NaAC-HAC (pH = 4), and was shaken for 6 hours for extraction. The extract was then centrifuged to obtain the extract solution. It was further extracted with 30 mL of 1 mol·L-1 mgCl2 (pH = 8) for 2 hours, and then extracted with 30 mL of deionized water once. The extracted solutions were combined (totaling 90 mL), and the phosphorus concentration in the extract solution was directly determined using the molybdenum-sulfur antimony method. At the same time, the extract solution was used as a blank test. |
| Self-ecological phosphorus | De-P | After adding the Ca-P residue to 30 mL of 1 mol/L HCl and shaking for 16 hours, centrifuge, then wash the residue with deionized water once, combine the extraction liquids, and determine the phosphorus concentration in the extraction liquids. At the same time, use the extraction liquid as a blank test. |
| Organophosphorus | Or-P | The residual substances of De-P were transferred to a porcelain crucible, dried, and then subjected to 550°C ashing in a muffle furnace for 2 hours. After cooling, 30 mL of 1 mol·L-1 HCl was added and the mixture was shaken for 16 hours. The mixture was then centrifuged and the phosphorus concentration in the extract was determined. At the same time, the extract was used as a blank test. |

**Table S2** Experimental treatment of control variable method

| Handling method | Solution preparation |
| --- | --- |
| PSCK | The ultra-pure water contains only 1mg·L-1 and is added to the PS for adsorption |
| PSC0 | Ca2+=0mg·L-1，HCO3-=200mg·L-1，P=1mg·L-1, added to PS |
| PSC20 | Ca2+=20mg·L-1，HCO3-=200mg·L-1，P=1mg·L-1, added to PS |
| PSC60 | Ca2+=60mg·L-1，HCO3-=200mg·L-1，P=1mg·L-1, added to PS |
| PSC80 | Ca2+=80mg·L-1，HCO3-=200mg·L-1，P=1mg·L-1, added to PS |
| PSC120 | Ca2+=120mg·L-1，HCO3-=200mg·L-1，P=1mg·L-1, added to PS |
| PSH0 | Ca2+=60mg·L-1，HCO3-=0mg·L-1，P=1mg·L-1, added to PS |
| PSH50 | Ca2+=60mg·L-1，HCO3-=50mg·L-1，P=1mg·L-1, added to PS |
| PSH100 | Ca2+=60mg·L-1，HCO3-=100mg·L-1，P=1mg·L-1, added to PS |
| PSH200 | Ca2+=60mg·L-1，HCO3-=200mg·L-1，P=1mg·L-1, added to PS |
| PSH300 | Ca2+=60mg·L-1，HCO3-=300mg·L-1，P=1mg·L-1, added to PS |
| GSCK | The ultra-pure water contains only 1mg·L-1 and is added to GS for adsorption |
| GSC0 | Ca2+=0mg·L-1，HCO3-=200mg·L-1，P=1mg·L-1, added to GS |
| GSC20 | Ca2+=20mg·L-1，HCO3-=200mg·L-1，P=1mg·L-1, added to GS |
| GSC60 | Ca2+=60mg·L-1，HCO3-=200mg·L-1，P=1mg·L-1, added to GS |
| GSC80 | Ca2+=80mg·L-1，HCO3-=200mg·L-1，P=1mg·L-1, added to GS |
| GSC120 | Ca2+=120mg·L-1，HCO3-=200mg·L-1，P=1mg·L-1, added to GS |
| GSH0 | Ca2+=60mg·L-1，HCO3-=0mg·L-1，P=1mg·L-1, added to GS |
| GSH50 | Ca2+=60mg·L-1，HCO3-=50mg·L-1，P=1mg·L-1, added to GS |
| GSH100 | Ca2+=60mg·L-1，HCO3-=100mg·L-1，P=1mg·L-1, added to GS |
| GSH200 | Ca2+=60mg·L-1，HCO3-=200mg·L-1，P=1mg·L-1, added to GS |
| GSH300 | Ca2+=60mg·L-1，HCO3-=300mg·L-1，P=1mg·L-1, added to GS |

**Table S3** Preparation of static test water

| Handling method | Solution preparation |
| --- | --- |
| PSCK | The ultra-pure water contains only 1mg·L-1 and is added to ST |
| PSA | Ca2+=0mg·L-1，HCO3-=200mg·L-1，P=1mg·L-1, added to PS |
| PSB | Ca2+=60mg·L-1，HCO3-=200mg·L-1，P=1mg·L-1, added to PS |
| PSC | Ca2+=120mg·L-1，HCO3-=200mg·L-1，P=1mg·L-1, added to PS |
| PSX | Ca2+=60mg·L-1，HCO3-=0mg·L-1，P=1mg·L-1, added to PS |
| PSY | Ca2+=60mg·L-1，HCO3-=100mg·L-1，P=1mg·L-1, added to PS |
| PSZ | Ca2+=60mg·L-1，HCO3-=300mg·L-1，P=1mg·L-1, added to PS |
| GQCK | The ultra-pure water contains only 1mg·L-1 and is added to GQ. |
| GQA | Ca2+=0mg·L-1，HCO3-=200mg·L-1，P=1mg·L-1, added to GQ |
| GQB | Ca2+=60mg·L-1，HCO3-=200mg·L-1，P=1mg·L-1, added to GQ |
| GQC | Ca2+=120mg·L-1，HCO3-=200mg·L-1，P=1mg·L-1, added to GQ |
| GQX | Ca2+=60mg·L-1，HCO3-=0mg·L-1，P=1mg·L-1, added to GQ |
| GQY | Ca2+=60mg·L-1，HCO3-=100mg·L-1，P=1mg·L-1, added to GQ |
| GQZ | Ca2+=60mg·L-1，HCO3-=300mg·L-1，P=1mg·L-1, added to GQ |
| CJCK | The ultra-pure water contains only 1mg·L-1 and is added to CJ |
| CJA | Ca2+=0mg·L-1，HCO3-=200mg·L-1，P=1mg·L-1, added to CJ |
| CJB | Ca2+=60mg·L-1，HCO3-=200mg·L-1，P=1mg·L-1, added to CJ |
| CJC | Ca2+=120mg·L-1，HCO3-=200mg·L-1，P=1mg·L-1, added to CJ |
| CJX | Ca2+=60mg·L-1，HCO3-=0mg·L-1，P=1mg·L-1, added to CJ |
| CJY | Ca2+=60mg·L-1，HCO3-=100mg·L-1，P=1mg·L-1, added to CJ |
| CJZ | Ca2+=60mg·L-1，HCO3-=300mg·L-1，P=1mg·L-1, added to CJ |
| PCCK | The ultra-pure water contains only 1mg·L-1 and is added to the PC |
| PCA | Ca2+=0mg·L-1，HCO3-=200mg·L-1，P=1mg·L-1, added to PC |
| PCB | Ca2+=60mg·L-1，HCO3-=200mg·L-1，P=1mg·L-1, added to PC |
| PCC | Ca2+=120mg·L-1，HCO3-=200mg·L-1，P=1mg·L-1, added to PC |
| PCX | Ca2+=60mg·L-1，HCO3-=0mg·L-1，P=1mg·L-1, added to PC |
| PCY | Ca2+=60mg·L-1，HCO3-=100mg·L-1，P=1mg·L-1, added to PC |
| PCZ | Ca2+=60mg·L-1，HCO3-=300mg·L-1，P=1mg·L-1, added to PC |
